# Supplementary material
Source: HighWire-hosted journal article supplement (https://jaha.ahajournals.org/content/5/12/e004647)
Supplement: inline-supplementary-material-1 [file inline-supplementary-material-1.pdf]

# **SUPPLEMENTAL MATERIAL**

**Table S1.** Characteristics of Study Participants from the Health and Retirement Study at Baseline

|                                    | Continuously<br>Married | Never<br>Married | Remarried<br>(n=443) | Divorced<br>(n=259) | Widowed<br>(n=743) | P<br>Value |
|------------------------------------|-------------------------|------------------|----------------------|---------------------|--------------------|------------|
| <b>Background Characteristics</b>  |                         |                  |                      |                     |                    |            |
| Age, median (IQR), y               | 70.5 (16.0)             | 68.0 (16.0)      | 68.0 (15.0)          | 65.0 (14.0)         | 82.0 (12.0)        | <.001      |
| Male                               | 59.5                    | 47.3             | 58.9                 | 42.1                | 19.4               | <.001      |
| Non-Hispanic black                 | 13.5                    | 40.5             | 14.0                 | 31.3                | 19.4               | <.001      |
| Non-Hispanic other race            | 1.9                     | 4.1              | 2.0                  | 2.3                 | 1.6                | .673       |
| Hispanic                           | 9.0                     | 8.1              | 9.0                  | 11.2                | 6.1                | .071       |
| Proxy interview                    | 17.1                    | 13.5             | 17.2                 | 11.6                | 25.8               | <.001      |
| Lives in the South                 | 44.7                    | 35.1             | 45.2                 | 44.4                | 46.0               | .511       |
| <b>Socioeconomic Factors</b>       |                         |                  |                      |                     |                    |            |
| Years of education, mean (SD)      | 11.8 (3.3)              | 11.0 (3.6)       | 11.8 (3.2)           | 11.4 (3.4)          | 10.7 (3.5)         | <.001      |
| Median household income (IQR)      | 33.0 (34.3)             | 9.8 (14.9)       | 33.0 (34.9)          | 14.2 (18.6)         | 13.2 (13.2)        | <.001      |
| No health insurance                | 5.4                     | 9.5              | 4.7                  | 11.2                | 3.2                | <.001      |
| <b>Psychosocial Factors</b>        |                         |                  |                      |                     |                    |            |
| No children                        | 4.1                     | 70.3             | 3.6                  | 10.4                | 9.4                | <.001      |
| No nearby friends and/or relatives | 19.1                    | 24.3             | 23.5                 | 30.9                | 21.4               | .002       |
| Never attends religious services   | 20.3                    | 23.0             | 32.1                 | 31.3                | 24.5               | <.001      |
| CES-D depressive symptoms (SD)     | 1.9 (2.1)               | 2.5 (2.2)        | 2.0 (2.2)            | 2.7 (2.5)           | 2.5 (2.2)          | <.001      |
| <b>Behavioral Factors</b>          |                         |                  |                      |                     |                    |            |
| Current or former smoker           | 62.0                    | 67.6             | 74.5                 | 74.9                | 50.1               | <.001      |
| Drinks alcohol in excess           | 12.7                    | 18.9             | 14.9                 | 22.4                | 12.0               | <.001      |
| No vigorous exercise               | 77.6                    | 86.5             | 75.2                 | 81.1                | 86.0               | <.001      |
| Does not take HTN medication       | 13.1                    | 8.1              | 12.4                 | 13.9                | 11.0               | .489       |
| <b>Physiological Factors</b>       |                         |                  |                      |                     |                    |            |
| Underweight, BMI < 18.5            | 1.3                     | 4.1              | 3.6                  | 2.3                 | 5.4                | <.001      |
| Overweight or obese, BMI ≥ 25.0    | 64.1                    | 54.1             | 63.4                 | 62.6                | 49.8               | <.001      |
| ADL limitations (SD)               | 1.0 (1.6)               | 1.2 (1.6)        | 0.9 (1.5)            | 0.9 (1.4)           | 1.5 (1.8)          | <.001      |
| Diagnosed chronic illness          | 75.7                    | 79.7             | 81.5                 | 80.7                | 82.8               | .009       |
| Recurrent stroke                   | 13.5                    | 8.1              | 17.2                 | 15.4                | 14.5               | .211       |
| Died during study period           | 50.5                    | 64.9             | 55.5                 | 47.5                | 70.7               | <.001      |

Abbreviations: CES-D, Center for Epidemiologic Studies Depression Scale; HTN, hypertension; BMI, body mass index.
